# Supplementary material
Source: PubMed Central journal article supplement (PMC9167738)
Supplement: NIHMS1792647-supplement-1.pdf [file NIHMS1792647-supplement-1.pdf]

### Supplementary Table 1: Small compounds for synergy screening

A total of eleven small compounds were selected for synergy screening with D4-LR in T3M4 cells. The basic information and reasons for selection are summarized in the table below.

| ID | Name                 | NCGC ID         | Top Conc (nM) | Reason for Selection                              | Class       |
|----|----------------------|-----------------|---------------|---------------------------------------------------|-------------|
| 1  | Daporinad            | NCGC00182868-02 | 1000          | consistent antagonism with T19 (positive control) | Assay Ctrl  |
| 2  | Panobinostat         | NCGC00263117-02 | 4000          | top synergistic MoA and confirmed                 | HDAC        |
| 3  | Quisinostat          | NCGC00346487-01 | 4000          | top synergistic MoA and confirmed                 | HDAC        |
| 4  | Trametinib           | NCGC00263180-01 | 4000          | T3M4 - KRAS mutation & top synergistic MoA        | KRAS        |
| 5  | SN38                 | NCGC00167831-01 | 1000          | std care & confirmed                              | TOP1        |
| 6  | Gemcitabine          | NCGC00168784-08 | 10000         | std care but the weak synergy                     | RRM         |
| 7  | Actinomycin D        | NCGC00025059-04 | 200           | top synergistic MoA and confirmed                 | Translation |
| 8  | Navitoclax (ABT-263) | NCGC00188344-05 | 4000          | top synergistic MoA and confirmed                 | BCL         |
| 9  | LY-2874455           | NCGC00346459-01 | 4000          | top synergy                                       | FGFR        |
| 10 | Aclarubicin          | NCGC00167503-02 | 1000          | std care & confirmed                              | TOP2        |
| 11 | Palbociclib          | NCGC00263129-01 | 10000         | std care & no activity & synergy in Hep3B         | CDK4        |

T19, anti-GPC3 immunotoxin(1)

Std, standard.

### Supplementary Table 2: Blood Analysis and Necropsy Results

**Blood analysis and necropsy.** Athymic nude mice were intraperitoneally injected with  $2 \times 10^6$  T3M4 cells. Mice were treated by *i.p.* injection every other day for a total of 14 injections. N=3/group. Values represent the mean  $\pm$  SD. All the treating groups were compared to the PBS control group. \* $P < 0.05$ , \*\* $P < 0.01$ , \*\*\* $P < 0.001$ . An increase in white blood cell levels was observed in mice from the PBS group. Elevated levels of red blood cells in mice from groups treated with PBS, D4-LR, or irinotecan were also detected. Serum chemistry analysis revealed a mild upregulation in alanine aminotransferase following D4-ABD-LR+irinotecan treatment relative to other treatments, suggesting slightly increased liver damage for that combinational therapy. All treatment strategies resulted in liver and spleen shrinkage when compared with the PBS group.

|                                            | PBS              | D4-LR              | D4-ABD-LR            | Irinotecan         | D4-LR+Iri          | D4-ABD-LR+Iri         | Normal Range |
|--------------------------------------------|------------------|--------------------|----------------------|--------------------|--------------------|-----------------------|--------------|
| White blood cells (K $\mu\text{L}^{-1}$ )  | 19.87 $\pm$ 3.09 | 9.07 $\pm$ 2.57*** | 7.06 $\pm$ 0.22***   | 7.45 $\pm$ 2.32*** | 5.33 $\pm$ 1.87*** | 8.12 $\pm$ 1.51***    | 1.8-10.7     |
| Neutrophils (K $\mu\text{L}^{-1}$ )        | 14.03 $\pm$ 3.85 | 3.91 $\pm$ 1.60*** | 3.78 $\pm$ 0.79***   | 3.82 $\pm$ 2.26*** | 2.14 $\pm$ 0.34*** | 3.56 $\pm$ 0.83***    | 0.10 - 2.40  |
| Lymphocytes (K $\mu\text{L}^{-1}$ )        | 3.46 $\pm$ 0.56  | 3.75 $\pm$ 0.76    | 2.43 $\pm$ 0.44      | 3.02 $\pm$ 0.46    | 2.50 $\pm$ 1.06    | 3.47 $\pm$ 0.51       | 0.90 - 9.30  |
| Monocytes (K $\mu\text{L}^{-1}$ )          | 1.77 $\pm$ 0.75  | 0.68 $\pm$ 0.13**  | 0.54 $\pm$ 0.30**    | 0.36 $\pm$ 0.02**  | 0.32 $\pm$ 0.19**  | 0.69 $\pm$ 0.06**     | 0.00 - 0.40  |
| Eosinophils (K $\mu\text{L}^{-1}$ )        | 0.55 $\pm$ 0.06  | 0.66 $\pm$ 0.23    | 0.22 $\pm$ 0.10      | 0.22 $\pm$ 0.06    | 0.34 $\pm$ 0.27    | 0.31 $\pm$ 0.37       | 0.00 - 0.20  |
| Basophils (K $\mu\text{L}^{-1}$ )          | 0.06 $\pm$ 0.03  | 0.07 $\pm$ 0.08    | 0.08 $\pm$ 0.03      | 0.03 $\pm$ 0.01    | 0.04 $\pm$ 0.02    | 0.08 $\pm$ 0.06       | 0.00 - 0.20  |
| Red blood cells (M $\mu\text{L}^{-1}$ )    | 37.47 $\pm$ 2.32 | 47.37 $\pm$ 6.05** | 9.39 $\pm$ 0.63***   | 41.27 $\pm$ 0.81   | 9.31 $\pm$ 0.33*** | 9.34 $\pm$ 0.73***    | 6.36-9.42    |
| Albumin (g $\text{dL}^{-1}$ )              | 2.17 $\pm$ 0.06  | 3.50 $\pm$ 0.00**  | 3.63 $\pm$ 0.15**    | 3.77 $\pm$ 0.85*** | 3.63 $\pm$ 0.06**  | 4.03 $\pm$ 0.31***    | 2.50-4.80    |
| Alkaline phosphatase                       | 47.67 $\pm$ 4.04 | 81 $\pm$ 14.11**   | 60.33 $\pm$ 10.26    | 62.00 $\pm$ 8      | 75.00 $\pm$ 2.65*  | 58.33 $\pm$ 12.21     | 62.00-209.00 |
| Alanine aminotransferase                   | 25.67 $\pm$ 0.58 | 42.00 $\pm$ 5      | 74.67 $\pm$ 20.21*** | 35.67 $\pm$ 7.64   | 59.33 $\pm$ 5.51** | 131.67 $\pm$ 11.02*** | 28.00-132.00 |
| Total bilirubin (mg $\text{dL}^{-1}$ )     | 0.20 $\pm$ 0.00  | 0.30 $\pm$ 0.00    | 0.27 $\pm$ 0.06      | 0.33 $\pm$ 0.06*   | 0.23 $\pm$ 0.06    | 0.27 $\pm$ 0.06       | 0.10-0.90    |
| Blood urea nitrogen (mg $\text{dL}^{-1}$ ) | 15.00 $\pm$ 3.61 | 20.00 $\pm$ 1.00   | 25.33 $\pm$ 2.31***  | 19.67 $\pm$ 0.58   | 25.00 $\pm$ 1***   | 28.00 $\pm$ 2.65***   | 18.00-29.00  |
| Creatinine (mg $\text{dL}^{-1}$ )          | 0.20 $\pm$ 0.00  | 0.23 $\pm$ 0.06    | 0.33 $\pm$ 0.06      | 0.30 $\pm$ 0.10    | 0.20 $\pm$ 0.00    | 0.23 $\pm$ 0.06       | 0.20-0.80    |
| Total protein (g $\text{dL}^{-1}$ )        | 5.73 $\pm$ 0.15  | 5.70 $\pm$ 0.30    | 5.60 $\pm$ 0.17      | 5.57 $\pm$ 0.25    | 5.63 $\pm$ 0.35    | 5.67 $\pm$ 0.15       | 3.60-6.60    |
| Globulin (g $\text{dL}^{-1}$ )             | 3.57 $\pm$ 0.21  | 2.13 $\pm$ 0.25**  | 2.00 $\pm$ 0.1**     | 1.80 $\pm$ 0.79*** | 2.00 $\pm$ 0.36**  | 1.63 $\pm$ 0.4***     | 0.00-0.60    |
| Organ Weight (g)                           |                  |                    |                      |                    |                    |                       |              |
| Brain                                      | 0.44 $\pm$ 0.02  | 0.47 $\pm$ 0.00    | 0.43 $\pm$ 0.03      | 0.42 $\pm$ 0.04    | 0.43 $\pm$ 0.02    | 0.42 $\pm$ 0.01       |              |
| Heart                                      | 0.14 $\pm$ 0.01  | 0.14 $\pm$ 0.01    | 0.12 $\pm$ 0.01      | 0.13 $\pm$ 0.00    | 0.11 $\pm$ 0.00*   | 0.12 $\pm$ 0.01       |              |
| Kidney                                     | 0.35 $\pm$ 0.03  | 0.35 $\pm$ 0.01    | 0.30 $\pm$ 0.04      | 0.32 $\pm$ 0.01    | 0.30 $\pm$ 0.02    | 0.28 $\pm$ 0.01*      |              |
| Liver                                      | 1.54 $\pm$ 0.18  | 1.25 $\pm$ 0.03*   | 1.07 $\pm$ 0.03***   | 1.06 $\pm$ 0.07*** | 1.01 $\pm$ 0.08*** | 1.05 $\pm$ 0.12***    |              |

|          |                 |                   |                   |                   |                   |                   |
|----------|-----------------|-------------------|-------------------|-------------------|-------------------|-------------------|
| Lung     | $0.17 \pm 0.01$ | $0.18 \pm 0.01$   | $0.15 \pm 0.01$   | $0.15 \pm 0.02$   | $0.16 \pm 0.02$   | $0.17 \pm 0.01$   |
| Pancreas | $0.11 \pm 0.02$ | $0.16 \pm 0.02$   | $0.15 \pm 0.03$   | $0.15 \pm 0.04$   | $0.14 \pm 0.03$   | $0.13 \pm 0.01$   |
| Spleen   | $0.24 \pm 0.06$ | $0.14 \pm 0.04^*$ | $0.12 \pm 0.02^*$ | $0.14 \pm 0.07^*$ | $0.13 \pm 0.01^*$ | $0.12 \pm 0.02^*$ |

---

**sgRNA-1-F / sgRNA-2-F**

CCACCCTGCCCGCCCCCTCTCCTCTCCCGCGGCCGCCTAG**GGGC**

**CGGGCCGGCGGCGGGGGAGGCGCCGAGCCGGGACTGCGCTAGC**

**sgRNA-2-R**

**CCGCCGCGCTCTGGGC**TGCC**GAGCGAGCGTTCGGACCTCGCAC**

CCCGCGGCCCGCGCCGCCGCCGCCGGCTTTTGTGTCTC

CGCCTCCTCGGCCGCCGCCCTCTGGACCGCGAG**CCGCGCGCG**

**sgRNA-3-F**

**CCGGACCTTGGCTCTGCCCTTCGCGGG****CGGGA**ACTGCGCAGGA

**sgRNA-1-R / sgRNA-3-R**

**CCCGGCCA**AGGATCCGAGAGAGGCGCGGGCGGGTGGCCGGGGGC

GCCGCCGGCCCCGCC**ATG**GAGCTC...

**NNNNN**: forward/reverse guide RNA  
**NNNNN**: promoter 1  
**NNNNN**: promoter 2  
**NNN**: PAM sequence  
**ATG**: start codon

**Supplementary Figure 1. Sequences of the predicted GPC1 promoters and three pairs of sgRNAs.** The underlined parts are forward or reverse sgRNAs. The bases in magenta or cyan indicate the sequences of predicted GPC1 promoter 1 or 2, respectively. PAM sequences are in red. ATG highlighted in yellow represents the start codon.

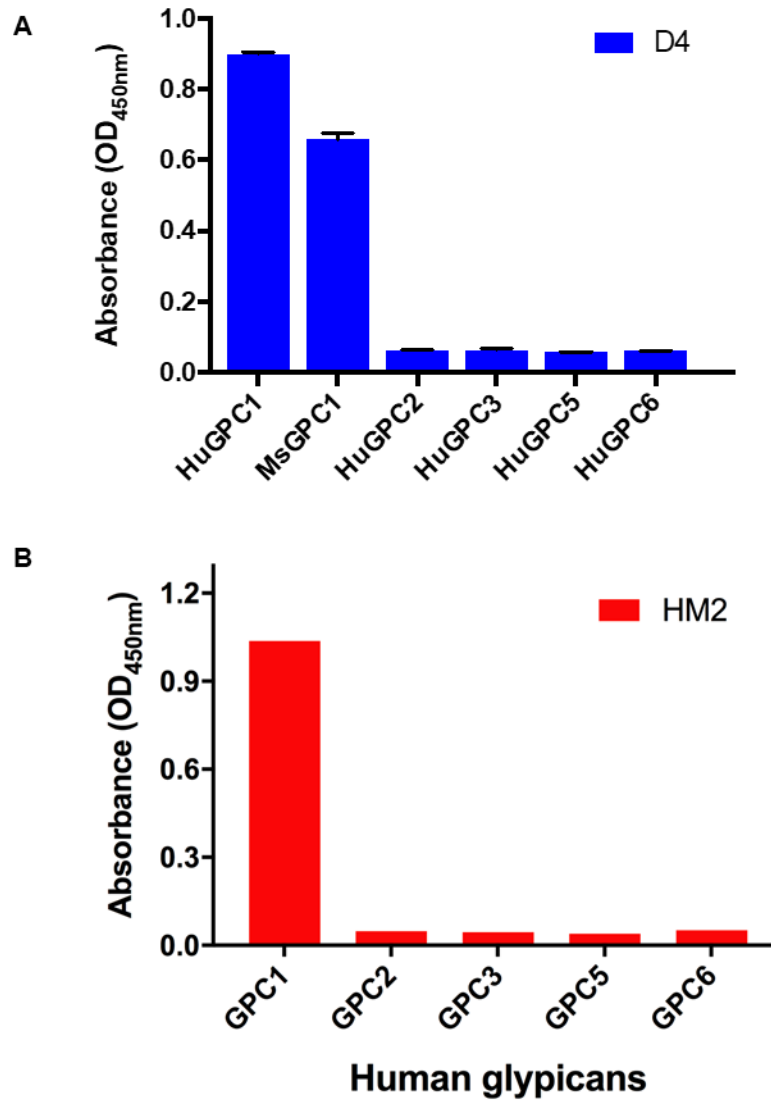

**Supplementary Figure 2. Binding of D4 or HM2 antibodies to human or mouse glypicans. A,** Binding activity of D4 antibody against human glypicans and mouse GPC1 analyzed by ELISA. **B,** Binding ability of HM2 antibody against human glypicans analyzed by ELISA.

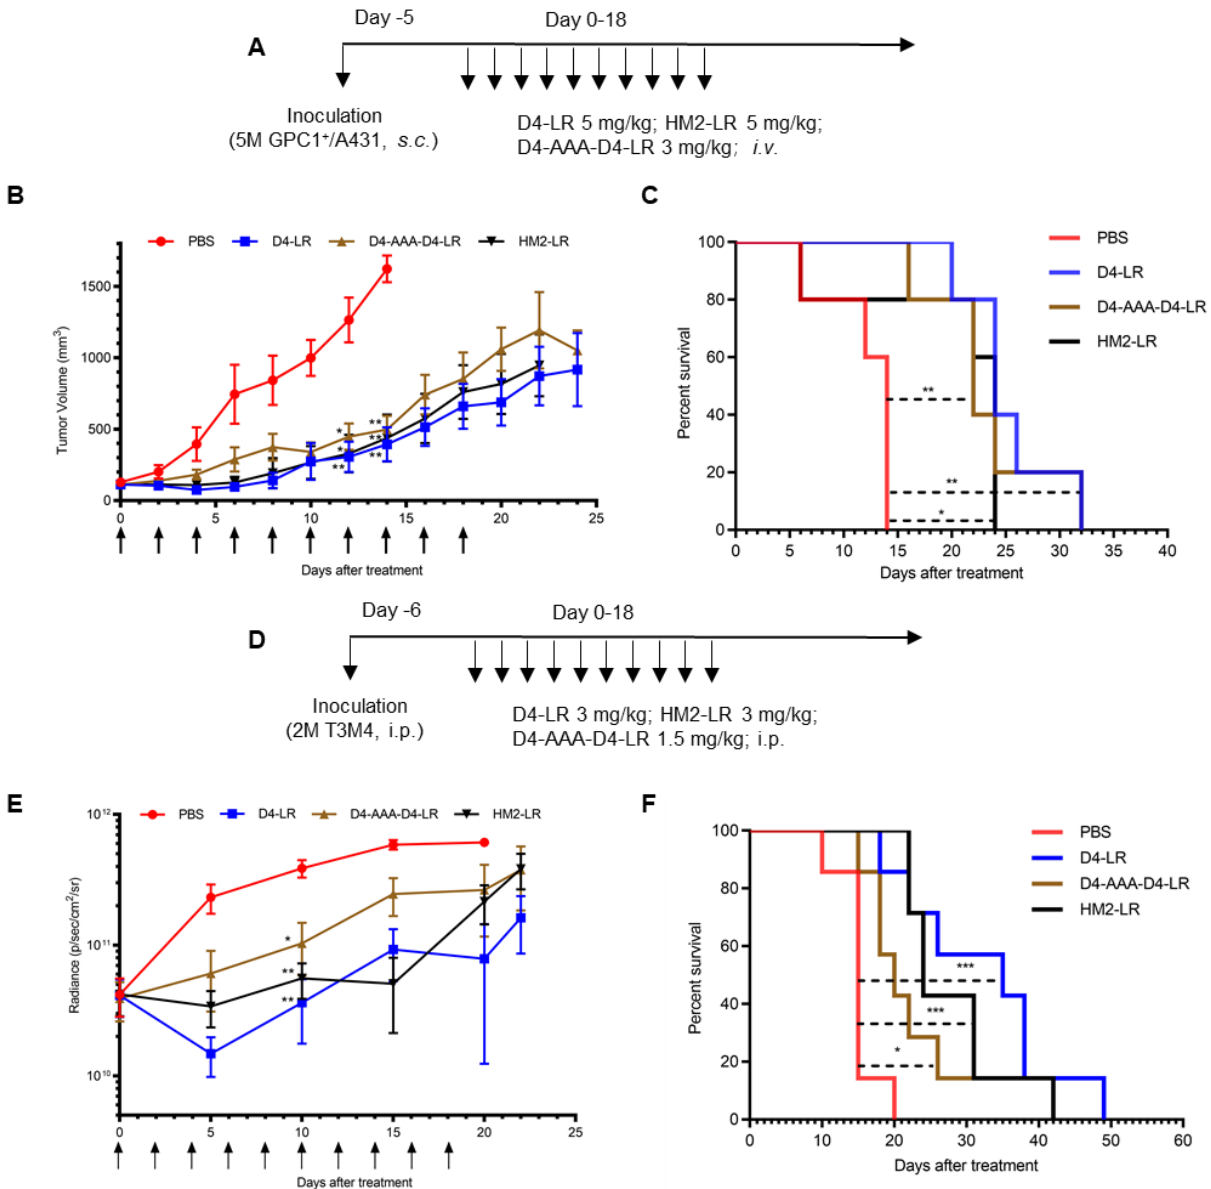

**Supplementary Figure 3. Anti-GPC1 immunotoxins inhibited tumor growth *in vivo*.** **A**, Five-week-old female athymic nude mice were injected with  $5 \times 10^6$  GPC1<sup>+</sup>/A431 cells in the right dorsal flank. Mice (n=5 per group) were treated 10 times with D4-LR (5 mg/kg), D4-AAA-D4-LR (3 mg/kg), or HM2-LR (5 mg/kg) by tail vein injection on the days indicated with a black arrow. **B**, Average tumor volume  $\pm$  SEM for each experimental group in the GPC1<sup>+</sup>/A431 subcutaneous mouse model. **C**, Kaplan-Meier survival curve for each group in GPC1<sup>+</sup>/A431 subcutaneous mouse model. **D**, Five-week-old female athymic nude mice were inoculated with  $2 \times 10^6$  T3M4 cells in the right abdominal cavity. Mice (n=5 per group) were treated with D4-LR (3 mg/kg), D4-AAA-D4-LR (1.5 mg/kg), or HM2-LR (3 mg/kg) by *i.p.* injection on the days indicated with a black arrow. **E**, Average tumor volume  $\pm$  SEM for each experimental group in the T3M4 xenograft mouse model. **F**, Kaplan-Meier survival curve in T3M4 xenograft mouse model.

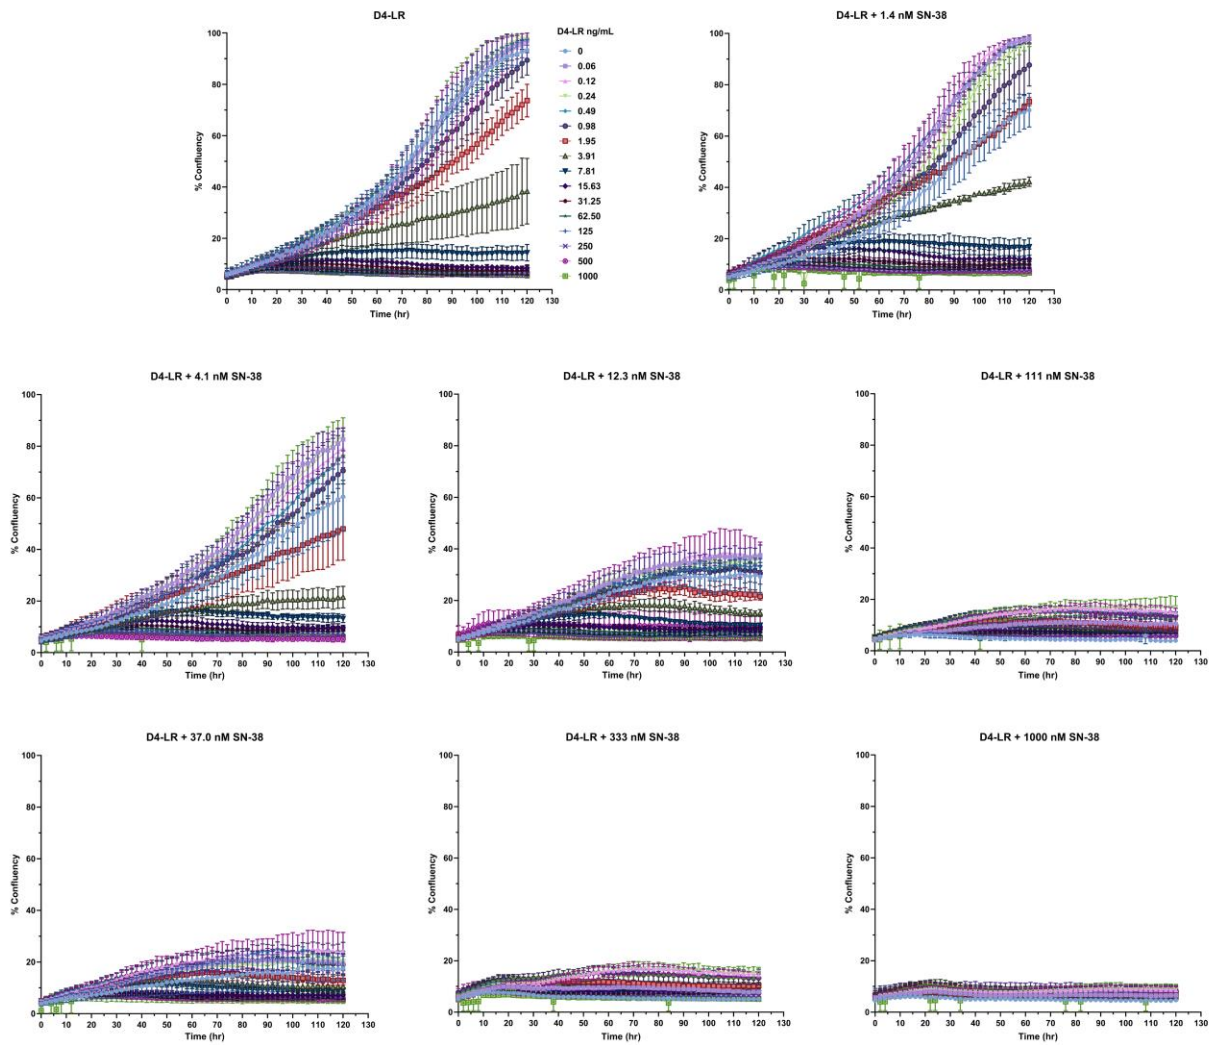

**Supplementary Figure 4.** IncuCyte assay indicating the confluency of T3M4 cells treated with D4-LR alone or in combination with SN-38 at different concentration points. Cell confluency was continuously monitored every two hours over 5 days.

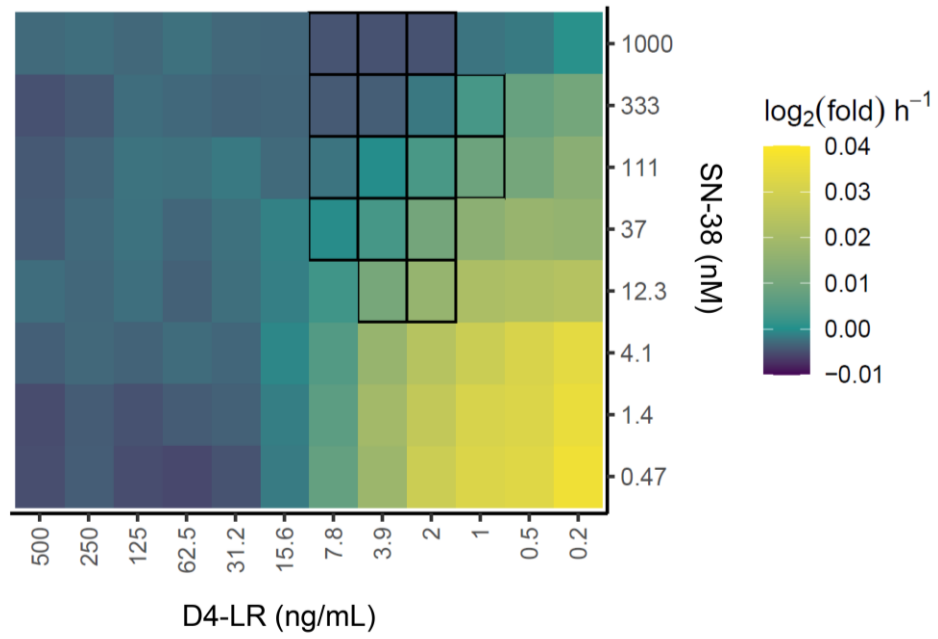

**Supplementary Figure 5. Synergy analysis of D4-LR and SN-38.** Black rectangles in the block heatmap highlight the dose combinations which reduced the growth rate by  $>0.005 \log_2$ fold per hour (using the HSA model).



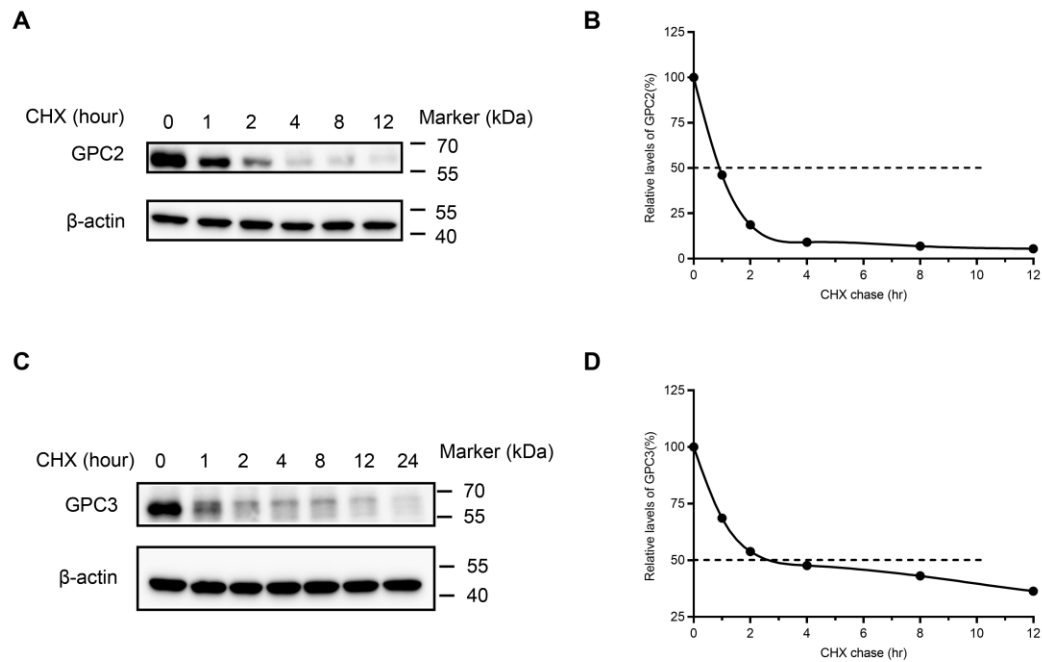

**Supplementary Figure 6. Turnover rate analysis for GPC2 and GPC3.** **A**, Western blot analysis, detecting GPC2 expression levels in IMR5 cells (GPC2-positive) after cycloheximide treatment. **B**, Signals of GPC2 in **A** were quantified with Image Lab software (Bio-Rad). The GPC2 band intensity was normalized to  $\beta$ -actin and then normalized to the t=0 controls and plotted. **C**, Levels of GPC3 in Hep3B cells (GPC3-positive) treated with cycloheximide. **D**, The GPC3 band intensity was normalized to  $\beta$ -actin, and then normalized to the t=0 controls and plotted.

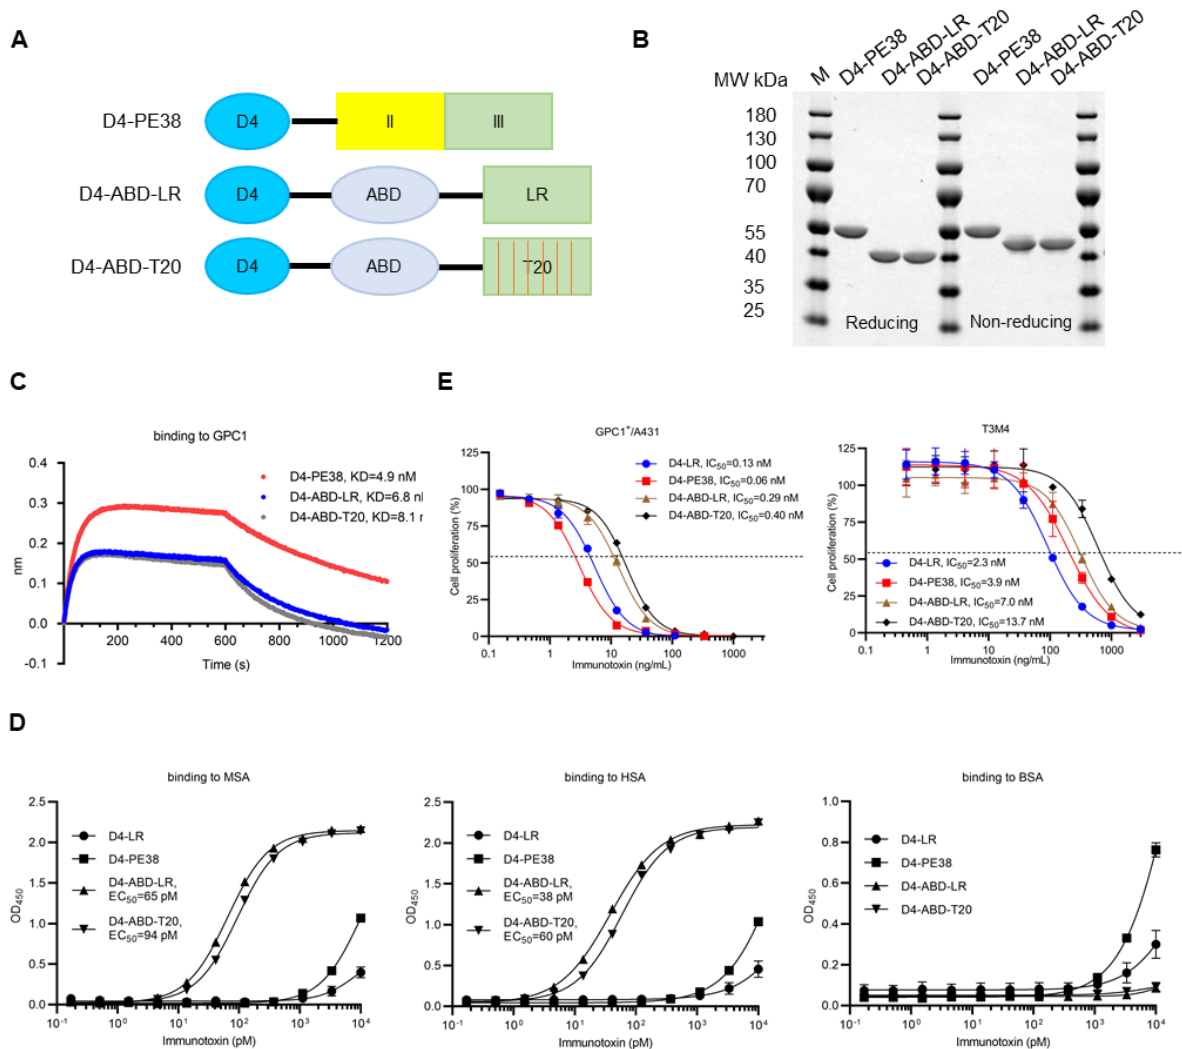

**Supplementary Figure 7. D4-ABD-LR showed great binding to human and mouse serum albumin.** **A**, Schematic of three new D4-based immunotoxins, D4-PE38, D4-ABD-LR, and D4-ABD-T20. PE38 contains both domains II and III of *Pseudomonas* exotoxin A. T20 is an LR toxin fragment containing 6-point mutations targeting T cell epitope. **B**, SDS-PAGE gel analysis. **C**, Binding affinity to GPC1 analyzed by Octet. **D**, Binding ability of D4-based immunotoxins to bovine serum albumin (BSA), human serum albumin (HSA), and mouse serum albumin (MSA). Values represent mean  $\pm$  SD. **E**, Cytotoxicity of D4-based immunotoxins on GPC1<sup>+</sup>/A431 and T3M4 cells. Values represent mean  $\pm$  SD.

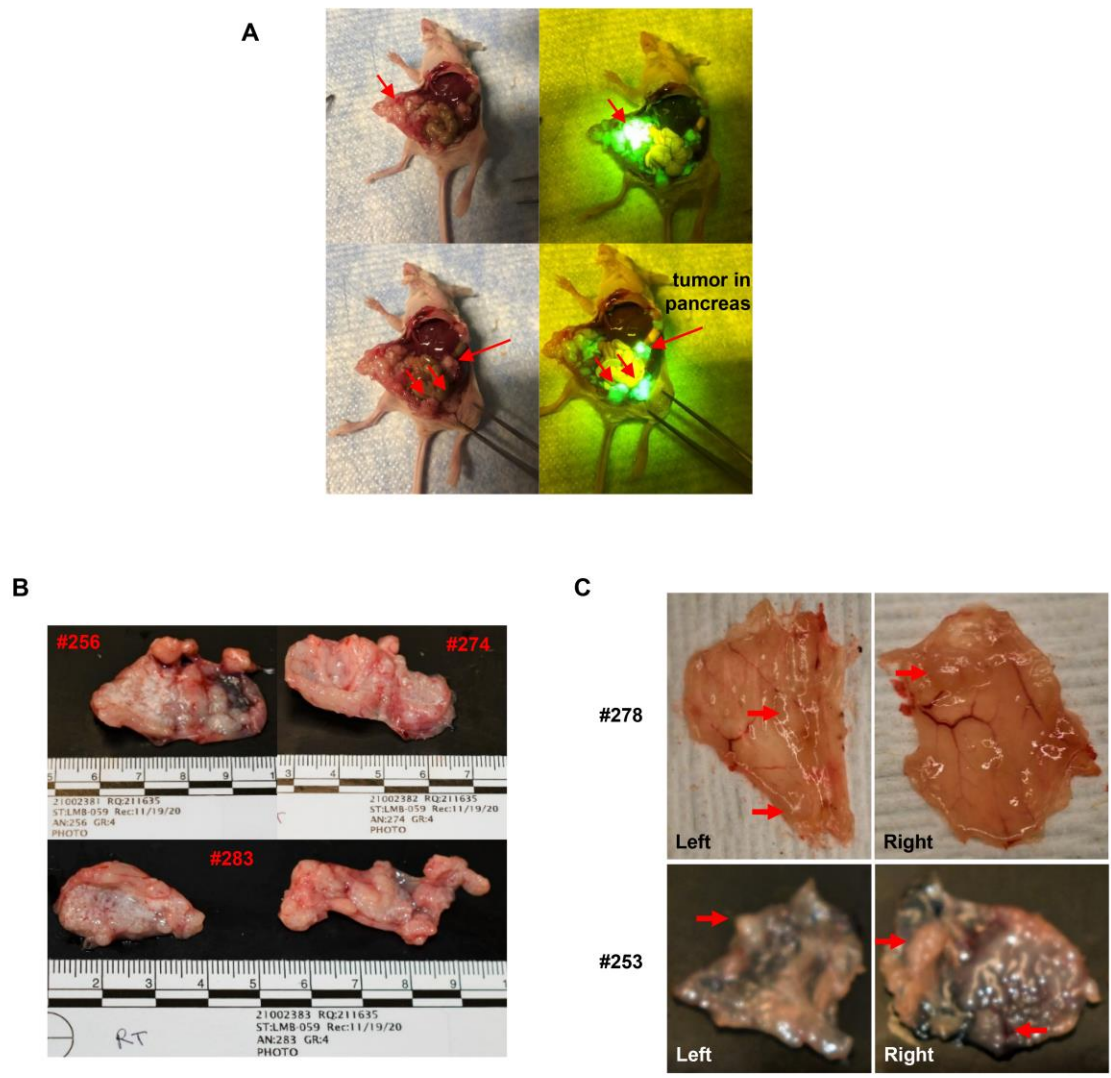

**Supplementary Figure 8. Tumors from the mice treated with PBS, compounds, or immunotoxins. A,** Representative pictures of a dissected mouse from PBS group. Red arrows indicate tumors tagged with GFP grow in the abdominal cavity or on the peritoneal wall under bright light (left) and blue light (right). **B,** Representative images of isolated tumors from mice in PBS group (#256, #274, #283). **C,** Representative images of small nodules on the peritoneal wall from mice treated with D4-LR (#278) or irinotecan (#253).

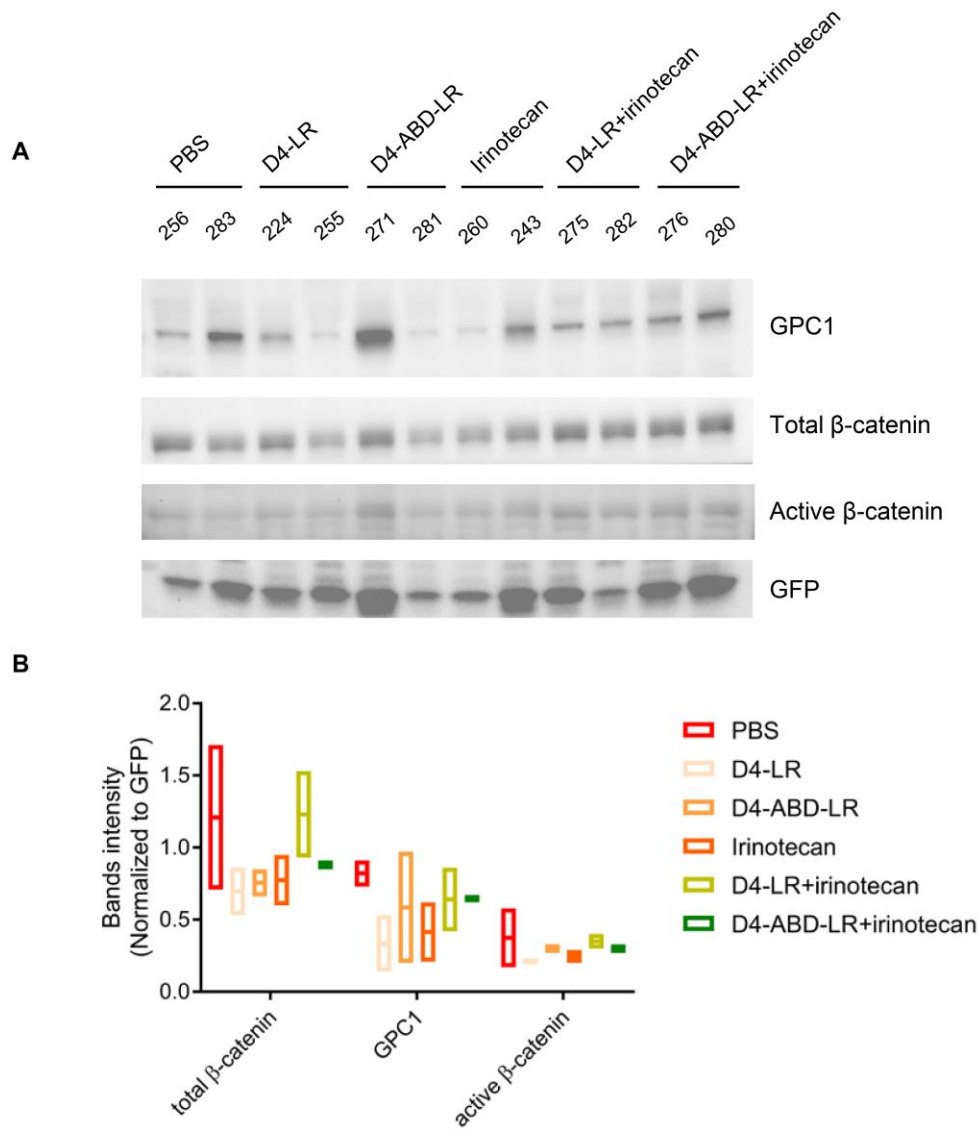

**Supplementary Figure 9. Expression levels of GPC1,  $\beta$ -catenin, active  $\beta$ -catenin in harvested tumors. A,** Harvested tumors (from two individual mice per group) were lysed and investigated for the expression levels of  $\beta$ -catenin, active  $\beta$ -catenin, and GPC1, by western blot analysis. **B,** Quantified data of WB bands intensity. The intensity of all bands in A was quantified by normalizing to GFP that indicates tumor cells (T3M4 tumor cells tagged with GFP and luciferase).

## Reference

1. Fleming BD, Urban DJ, Hall MD, Longerich T, Greten TF, Pastan I, *et al.* Engineered Anti-GPC3 Immunotoxin, HN3-ABD-T20, Produces Regression in Mouse Liver Cancer Xenografts Through Prolonged Serum Retention. *Hepatology* **2020**;71(5):1696-711 doi 10.1002/hep.30949.
